# Supplementary material for: Discovery of KC-1: A Novel Porcine Dendritic Cell-Targeting Peptide with Potential Applications in Swine Vaccine Design
Source: Research Square preprint supplement (doi:10.21203/rs.3.rs-8110404/v1), 2025-12-01
Supplement: Supplementary file 1 [file c280904d12e42b030a22a5f9.docx]

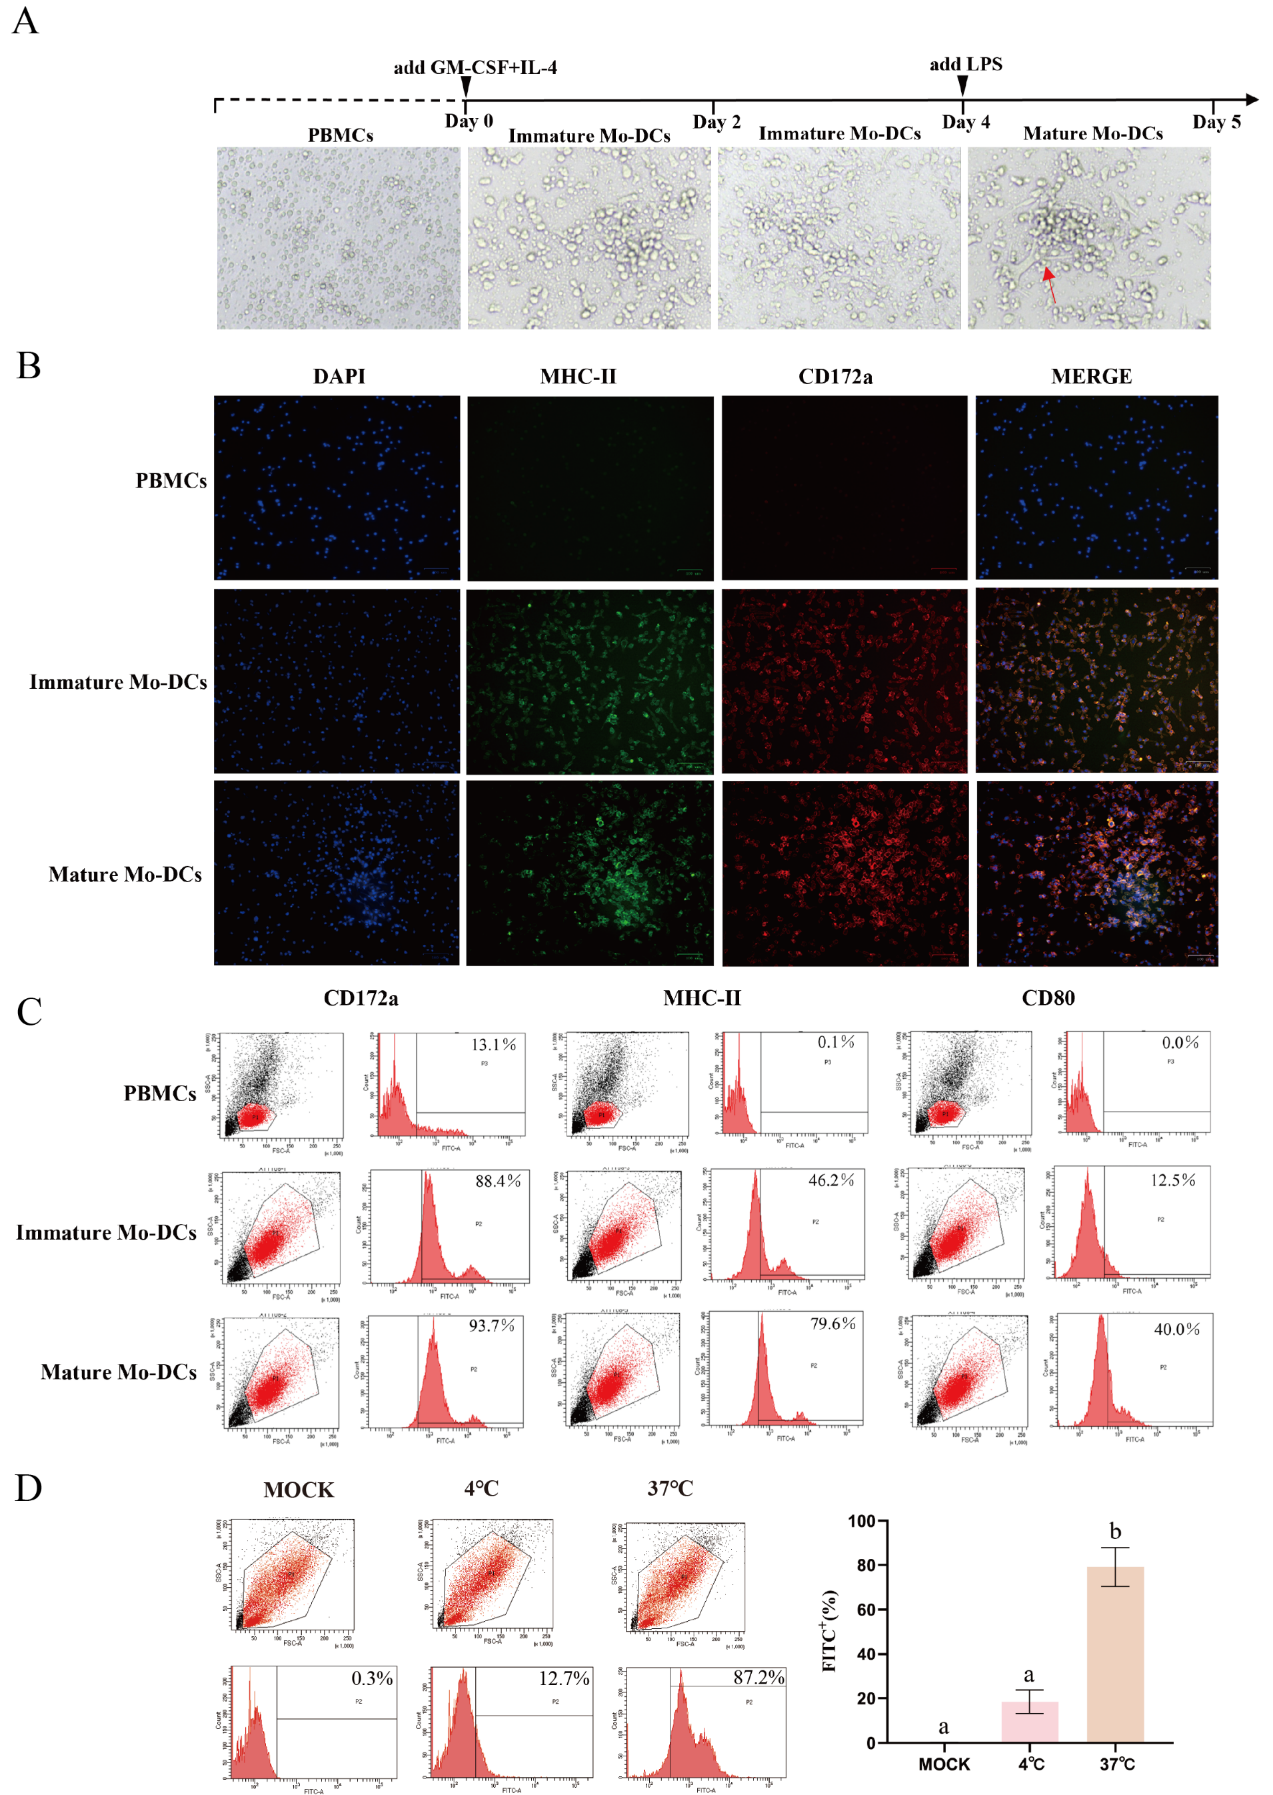
 **Supplementary Figure 1. Generation and characterization of porcine Mo-DCs.**
**(A)** Representative optical microscopy images (400×) showing the morphology of immature Mo-DCs (Day 1 and Day 4) and mature DCs (Day 5, after LPS stimulation for 24 h).
**(B)** Immunostaining of immature Mo-DCs and mature Mo-DCs for MHC-II (green), CD172 (red), and nuclei stained with DAPI (blue). 
**(C)** Flow cytometry analysis showing the expression of surface markers (CD172a, MHC-II, CD80, and CD14) on mature Mo-DCs and immature Mo-DCs.
**(D)** Flow cytometry evaluation of the phagocytic ability of Mo-DCs towards FITC-labeled glucan at 4°C and 37°C. Data are presented as mean ± standard deviation from triplicate experiments. Groups labeled with different letters (e.g., a, b) are significantly different (p < 0.01).


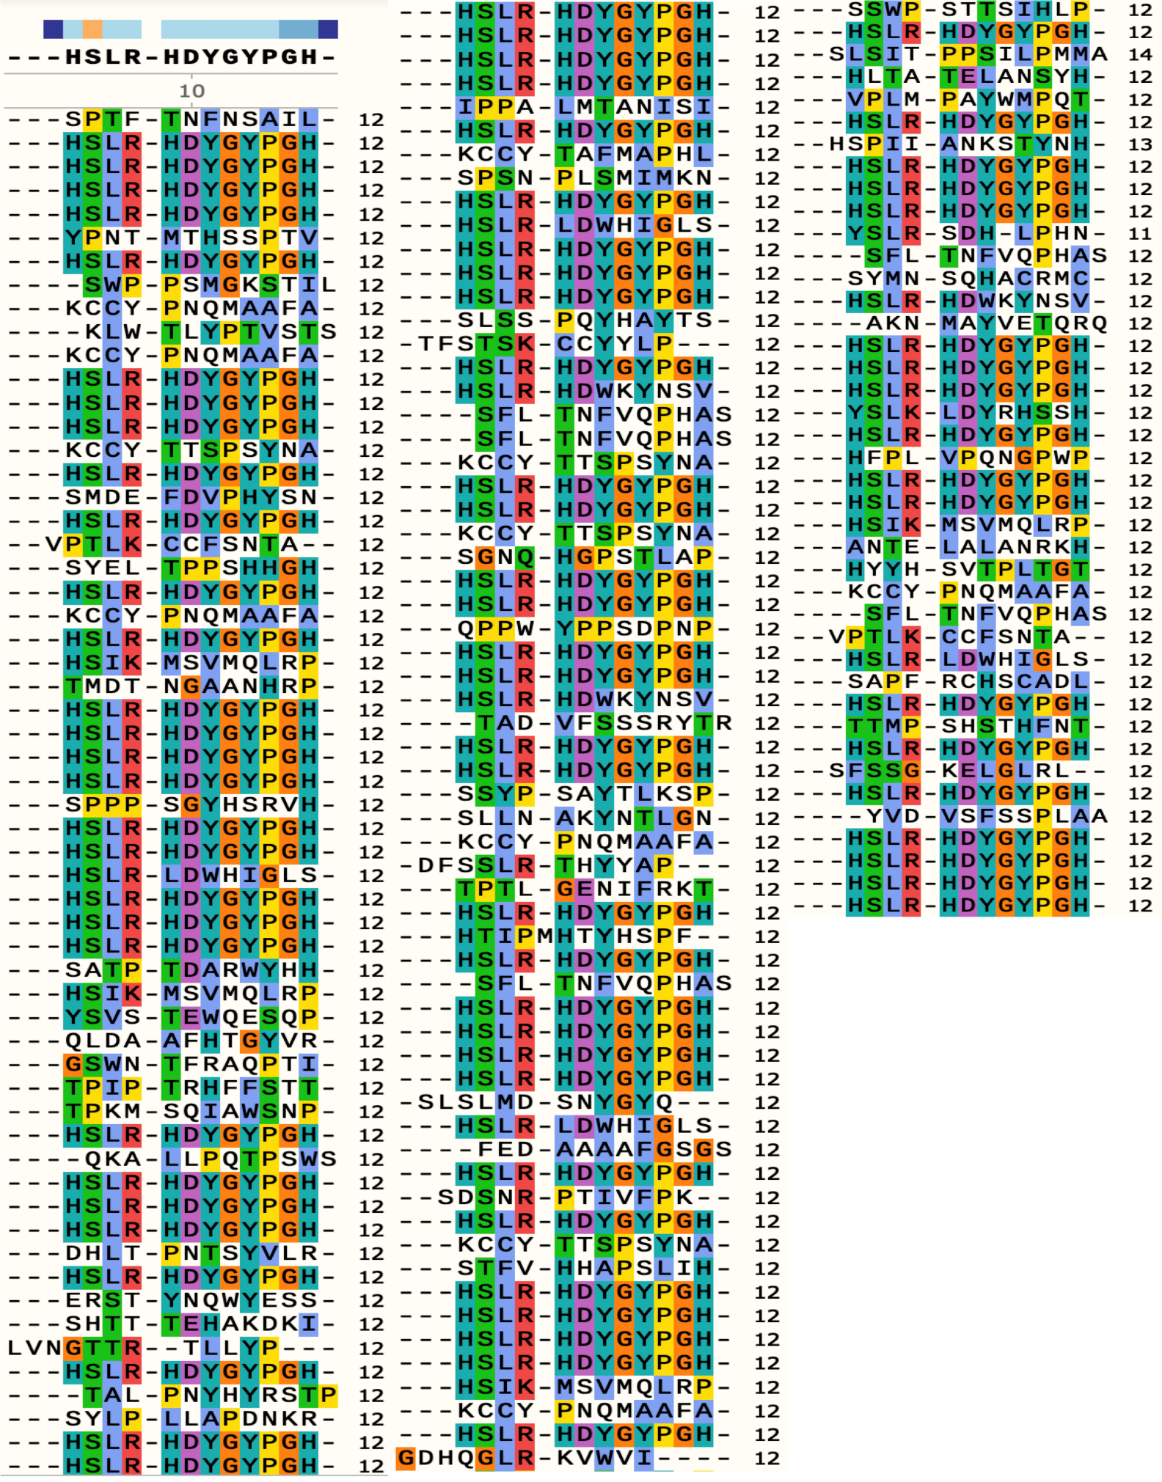


**Supplementary Figure 2.** Phage-displayed 12-mer peptide sequences

The amino acid sequences of 12-mer peptides selected by phage display against porcine dendritic cells. These sequences were obtained from individual phage clones after four consecutive rounds of biopanning.

**Supplementary Table 1.** Determination of phage recovery rate.

| Round | Input phages  (PFU) | Input phages  (PFU) | Input phages  (PFU) |
| --- | --- | --- | --- |
| 1 | 2×1011 | 1.14×105 | 5.7×10-7 |
| 2 | 1.67×1011 | 1.44×105 | 8.6×10-7 |
| 3 | 2.4×1011 | 1.05×105 | 4.3×10-7 |
| 4 | 1.9×1011 | 1.23×105 | 6.4×10-7 |

**Supplementary Table 2.** Sequences and frequency of peptides

| Phages | Sequence | Sequence |
| --- | --- | --- |
| HS | HSLRHDYGYPGH | 81/161(50.3%) |
| KC | KCCYPNQMAAFA | 11/161(6.8%) |
| SF | SFLTNFVQPHAS | 5/161(3.1%) |
| YP | YPNTMTHSSPTV | 1/161(0.6%) |
| SG | SGNQHGPSTLAP | 1/161(0.6%) |
| SM | SMDEFDVPHYSN | 1/161(0.6%) |
| TM | TMDT-NGAANHRP | 1/161(0.6%) |
| SA | SATP-TDARWYHH | 1/161(0.6%) |
| TA | TAL-PNYHYRSTP | 1/161(0.6%) |
| SL | SLSLMD-SNYGYQ | 1/161(0.6%) |
| TF | TFSTSK-CCYYLP | 1/161(0.6%) |
| QL | QLDA-AFHTGYVR | 1/161(0.6%) |
| QK | QKA-LLPQTPSWS | 1/161(0.6%) |
| IP | IPPA-LMTANISI | 1/161(0.6%) |
| ER | ERST-YNQWYESS | 1/161(0.6%) |
| YS | YSVS-TEWQESQP | 1/161(0.6%) |

**Supplementary Table 3**. Differential Proteins Identified Between KC1-BOTIN and NC-BOTIN Groups (25–40 kDa)

| **GeneName** | **Description** | | | **Mass** | **Score** | **Matches** | | **Sequences** | **emPAI** | **Coverage** |
| --- | --- | --- | --- | --- | --- | --- | --- | --- | --- | --- |
| SLA-DRB1 | MHC class II antigen | | | 30443 | 489 | 39(17) | | 13(7) | 2.47 | 50% |
| SAR1A | GTP-binding protein SAR1a | | | 22053 | 327 | 30(10) | | 8(5) | 2.10 | 29% |
| ETFA | Electron transfer flavoprotein subunit alpha | | | 35372 | 264 | 22(11) | | 11(7) | 1.93 | 43% |
| RAB30 | RAB30, member RAS oncogene family | | | 23386 | 235 | 15(7) | | 4(2) | 0.49 | 19% |
| CAPZA1 | F-actin-capping protein subunit alpha | | | 33167 | 181 | 20(6) | | 11(4) | 0.46 | 41% |
| PCBP1 | Poly(rC) binding protein 1 | | | 37991 | 156 | 11(7) | | 5(5) | 0.65 | 17% |
| SLA-DRA | MHC class II antigen | | | 28562 | 152 | 26(4) | | 4(1) | 0.25 | 6% |
| LSP1 | Lymphocyte-specific protein 1 | | | 38564 | 108 | 3(2) | | 1(1) | 0.18 | 6% |
| SLA-1 | MHC class I antigen | | | 38570 | 107 | 10(2) | | 8(2) | 0.39 | 34% |
| DHDH | Trans-1,2-dihydrobenzene-1,2-diol dehydrogenase | | | 21358 | 96 | 7(2) | | 4(1) | 0.55 | 30% |
| PRDX1 | Peroxiredoxin-1 | | | 25262 | 79 | 8(3) | | 3(1) | 0.13 | 14% |
| SEC22B | Vesicle-trafficking protein SEC22b | | | 24912 | 70 | 2(1) | | 2(1) | 0.13 | 12% |
| RAB13 | RAB13, member RAS oncogene family | | | 23084 | 66 | 11(2) | | 5(2) | 0.72 | 21% |
| DEGS1 | Sphingolipid delta (4)-desaturase DES1 | | | 38106 | 66 | 3(3) | | 3(3) | 0.28 | 10% |
| MRPL19 | Mitochondrial ribosomal protein L19 | | | 34690 | 63 | 2(1) | | 2(1) | 0.10 | 6% |
| EIF4A1 | RNA helicase | | | 44692 | 59 | 4(1) | | 3(1) | 0.07 | 8% |
| STOML3 | Stomatin-like protein 3 isoform 1 | | | 32225 | 59 | 9(3) | | 4(2) | 0.34 | 11% |
| NUP35 | Nucleoporin NUP53 | | | 35141 | 57 | 1(1) | | 1(1) | 0.09 | 5% |
| SLC25A36 | Solute carrier family 25-member 36 | | | 17650 | 56 | 1(1) | | 1(1) | 0.19 | 8% |
| EIF4H | Uncharacterized protein | | | 33343 | 54 | 2(1) | | 2(1) | 0.10 | 4% |
| ARFIP1 | ADP ribosylation factor interacting protein 1 | | | 44170 | 52 | | 4(1) | 2(1) | 0.07 | 6% |
| NDUFV3 | NADH dehydrogenase [ubiquinone] flavoprotein 3, mitochondrial | 46520 | | | 50 | | 1(1) | 1(1) | 0.07 | 3% |
| CASP7 | Caspase 7 | 37527 | | | 50 | | 1(1) | 1(1) | 0.09 | 6% |
| YIF1A | Protein YIF1 | | 32078 | | 49 | | 1(1) | 1(1) | 0.10 | 5% |
| JCHAIN | Joining chain of multimeric IgA and IgM | | 19822 | | 48 | | 4(1) | 2(1) | 0.17 | 10% |
| IFI35 | Interferon induced protein 35 | | 31548 | | 48 | | 1(1) | 1(1) | 0.11 | 5% |
| SLA-DQB1 | SLA-DQ beta1 domain | | 31075 | | 47 | | 4(1) | 2(1) | 0.11 | 8% |
| SCAMP2 | Secretory carrier-associated membrane protein | | 31412 | | 46 | | 2(1) | 1(1) | 0.11 | 4% |
| RPS8 | 40S ribosomal protein S8 | | 30551 | | 45 | | 7(1) | 6(1) | 0.11 | 26% |
| SCAMP1 | Secretory carrier-associated membrane protein | | 38138 | | 45 | | 5(1) | 3(1) | 0.09 | 11% |
| PCYT1B | Choline-phosphate cytidylyltransferase | | 40016 | | 43 | | 1(1) | 1(1) | 0.08 | 3% |
| COPS7A | COP9 signalosome subunit 7A | | 29765 | | 43 | | 2(1) | 2(1) | 0.11 | 8% |
| MOB1A | MOB kinase activator 1A | | 25008 | | 42 | | 4(1) | 4(1) | 0.13 | 21% |
| MARCHF5 | Membrane associated ring-CH-type finger 5 | | 31781 | | 42 | | 2(1) | 2(1) | 0.10 | 11% |
| TIMM23 | Mitochondrial import inner membrane translocase subunit TIM23 | | 22024 | | 41 | | 3(1) | 2(1) | 0.15 | 12% |
| BPHL | AB hydrolase-1 domain-containing protein | | 38394 | | 41 | | 6(1) | 5(1) | 0.09 | 14% |
| CTSS | Cathepsin S | | 38155 | | 39 | | 3(1) | 2(1) | 0.09 | 9% |
| LASP1 | LIM and SH3 domain protein 1 | | 31695 | | 39 | | 2(1) | 2(1) | 0.10 | 8% |
| RPSA | 40S ribosomal protein SA | | 30802 | | 37 | | 3(1) | 3(1) | 0.11 | 13% |

*Note:*

***GeneName:*** *Gene name.****Description:*** *Protein description.****Mass:*** *Molecular weight of the protein (Da).****Score:*** *Mascot protein score calculated from matched peptides. Individual peptide (ion) scores are calculated as −10 × log(P), where P is the probability that the match is random. Scores > 36 indicate significant identity or homology (p < 0.05).****Matches:*** *Total number of matched peptides, with the number of significant matches shown in parentheses.****Sequence:*** *Total number of matched sequences, with significant matches in parentheses.****emPAI:*** *Exponentially modified Protein Abundance Index, calculated as 10 (N_observed / N_observable) − 1.****Coverage:*** *Protein sequence coverage (%).*

**Supplementary Table 4** Sequence of Primers

| Primer name | sequence |
| --- | --- |
| -96gⅢ | CCCTCATAGTTAGCGTAACG |
| β-action-F | GGACTTCGAGCAGGAGA |
| β-action-R | AGGAAGGAGGGCTGGAAGAG |
| CD40-F | CGTGCGGGGACTAACAAGA |
| CD40-R | CCAACAGGACGGCAAACA |
| CD80-F | GAGTCCGAATATACTGGCAAAAGG |
| CD80-R | AGGTGCGGTTCTCATACTTGG |
| CD86-F | GTGTGGGATGGTGTCCTTTGT |
| CD86-R | TTTGTTCACTCGCCTTCCTGT |
| TLR-2-F | ACCATTCCCCAGCGTTTCT |
| TLR-2-R | GAGTCAGCAAGTCACCCTTTATGTT |
| TLR-4-F | ACCAGACTTTCTTGCAGTGGGTCA |
| TLR-4-R | AATGACGGCCTCCCTTATCTGACA |
| TLR-6-F | TCCCAGAATAGGATGCAGTGCCTT |
| TLR-6-R | ACTCCTTACATATGGGCAGGGCTT |

**Supplementary Table 5** Peptide Sequence

| Peptide Name | Sequence (N’-C’) | N-terminal Modification | |
| --- | --- | --- | --- |
| HS | HSLRHDYGYPGH | | FITC |
| KC | KCCYPNQMAAFA | | FITC |
| SF | SFLTNFVQPHAS | | FITC |
| NC | EPIHPETTFTNN | | FITC |
| KC | KCCYPNQMAAFA | | none |
| KC-K1A | ACCYPNQMAAFA | | none |
| KC-C2A | KACYPNQMAAFA | | none |
| KC-C3A | KCAYPNQMAAFA | | none |
| KC-Y4A | KCCAPNQMAAFA | | none |
| KC-P5A | KCCYANQMAAFA | | none |
| KC-N6A | KCCYPAQMAAFA | | none |
| KC-Q7A | KCCYPNAMAAFA | | none |
| KC-M8A | KCCYPNQAAAFA | | none |
| KC-F11A | KCCYPNQMAAAA | | none |
| C2AC3A | KAAYPNQMAAFA | | none |
| Q7AM8AF11A | KCCYPNAAAAAA | | none |
| C2AC3A (deleted) | KYPNQMAAFA | | none |
| KC-1 | KCCYPN | | none |
| KC-BIOTIN | KCCYPNQMAAFA | | BIOTIN |
| KC-1-BIOTIN | KCCYPN | | BIOTIN |
| NC-BIOTIN | NCPKYC | | BIOTIN |
| KC-1-FITC | KCCYPN | | FITC |
| NC-FITC | NCPKYC | | FITC |
